# Supplementary material for: The prognostic value of lymphovascular invasion in radical prostatectomy: a systematic review and meta-analysis
Source: PubMed Central journal article supplement — Asian J Androl. 2015 Oct 13;18(5):780–5. doi: 10.4103/1008-682X.156636 (PMC5000804; doi:10.4103/1008-682x.156636), 2015-10-13
Supplement: AJA-18-780_Suppl1.pdf [file AJA-18-780_Suppl1.pdf]

**Supplementary Table 1: Main characteristics of the eligible studies**

| Study                                     | Country     | Year | Institution                                                                                         | Recruitment period     | Study design  | Pathology stain method | Definition of LVI | Definition of BCR (ng ml <sup>-1</sup> ) | Number of patients | Median age at operation, range (Year) | PLND | Neo | ADT | EBRT | Median follow-up, range (months) |
|-------------------------------------------|-------------|------|-----------------------------------------------------------------------------------------------------|------------------------|---------------|------------------------|-------------------|------------------------------------------|--------------------|---------------------------------------|------|-----|-----|------|----------------------------------|
| Yee <i>et al.</i> <sup>34</sup>           | USA         | 2010 | Memorial Sloan-Kettering Cancer Center                                                              | 2004–2007              | Prospective   | HE                     | Yes               | PSA $\geq 0.1$                           | 1298               | 59, NA                                | 1298 | 0   | 24  | NA   | 27, NA                           |
| Lee <i>et al.</i> <sup>32</sup>           | Korea       | 2010 | Pusan National University Hospital                                                                  | 1999–2010              | Retrospective | HE                     | Yes               | PSA $\geq 0.2$                           | 361                | 69.0±6.8, 49–94                       | NA   | 0   | 0   | NA   | 42.4±33.6, 6.5–141.6             |
| Cho <i>et al.</i> <sup>31</sup>           | Korea       | 2010 | Korea Nation Cancer Center                                                                          | 2005–2009              | Retrospective | NA                     | No                | PSA $\geq 0.4$                           | 167                | 64.4, 49–80                           | NA   | NA  | 0   | NA   | 23.3, 2–51                       |
| Jeon <i>et al.</i> <sup>30</sup>          | Korea       | 2009 | Seoul Nation University Hospital                                                                    | 1995–2004              | Retrospective | NA                     | Yes               | PSA $\geq 0.2$                           | 237                | 64.5, 44–86                           | 135  | 18  | 30  | NA   | 41.4, 1–141.4                    |
| Whittemore <i>et al.</i> <sup>28</sup>    | USA         | 2008 | Wiford Hall Medical Center                                                                          | 1988–2003              | Retrospective | NA                     | No                | PSA $\geq 0.2$                           | 214                | NA, NA                                | NA   | 0   | 0   | 0    | NA, NA                           |
| Yamamoto <i>et al.</i> <sup>29</sup>      | Japan       | 2008 | Cancer Institute Hospital, Tokyo                                                                    | 1994–2005              | Retrospective | HE                     | Yes               | PSA $\geq 0.2$                           | 94                 | 68, 52–76                             | 94   | 0   | NA  | NA   | 47.4, 9.1–146.8                  |
| May <i>et al.</i> <sup>26</sup>           | Germany     | 2006 | Carl-Thiem Hospital<br>Vivantes-Clinic Am Urban                                                     | 1996–2003              | Retrospective | IHC (CD31)<br>HE       | Yes               | PSA $\geq 0.2$                           | 412                | 63.7, 44–79                           | 412  | 0   | 0   | NA   | 52.5, 10–116                     |
| Hofer <i>et al.</i> <sup>23</sup>         | Germany     | 2005 | University of Ulm Hospital                                                                          | 1986–2002              | Retrospective | NA                     | Yes               | PSA $\geq 0.4$                           | 201                | 64, 48–78                             | 201  | 0   | 201 | NA   | 41, 1–151                        |
| Antunes <i>et al.</i> <sup>21</sup>       | Brazil      | 2006 | Syrian Lebanese Hospital                                                                            | 1993–2000              | Retrospective | NA                     | Yes               | PSA $\geq 0.4$                           | 428                | 62.8, 40–83                           | NA   | 0   | 0   | NA   | 53.9±20.1, NA                    |
| Loeb <i>et al.</i> <sup>24</sup>          | USA         | 2006 | Washington University School of Medicine<br>North Western University Feinberg School<br>of Medicine | 1989–2002<br>2003–2004 | Retrospective | HE                     | Yes               | PSA $\geq 0.2$                           | 1709               | NA, NA                                | NA   | NA  | NA  | NA   | 34, 1–122                        |
| Brooks <i>et al.</i> <sup>22</sup>        | USA         | 2005 | Walter Reed Army Medical Center<br>National Naval Medical Center                                    | 1991–2001              | Retrospective | NA                     | No                | PSA $\geq 0.2$                           | 160                | NA, NA                                | 160  | NA  | NA  | 32   | 99.6, NA                         |
| Cheng <i>et al.</i> <sup>20</sup>         | USA         | 2005 | Indiana University Hospital                                                                         | 1990–1998              | Retrospective | HE                     | Yes               | PSA $\geq 0.1$                           | 504                | 62, NA                                | 504  | 0   | NA  | NA   | 44, 1.5–144                      |
| Shariat <i>et al.</i> <sup>19</sup>       | USA         | 2004 | University of Texas South Western<br>Medical Center                                                 | 1994–2002              | Retrospective | HE                     | Yes               | PSA $\geq 0.2$                           | 630                | 60.9, 40–75                           | 630  | NA  | NA  | NA   | 43.9, 4–100                      |
| Ito <i>et al.</i> <sup>17</sup>           | Japan       | 2002 | Keio University School of Medicine                                                                  | 1989–1998              | Retrospective | HE                     | Yes               | PSA $\geq 0.2$                           | 82                 | 66.5±0.5, 56–74                       | 82   | 0   | 0   | 0    | 21.7±1.9, 9–84.2                 |
| de la Taille <i>et al.</i> <sup>14</sup>  | USA         | 1999 | Columbia-Presbyterian Medical Center                                                                | 1993–1998              | Retrospective | HE                     | Yes               | PSA $\geq 0.2$                           | 241                | 62, 42–77                             | NA   | NA  | NA  | NA   | 22.9, 6–77.6                     |
| van den Ouden <i>et al.</i> <sup>13</sup> | Netherlands | 1997 | Erasmus University and Academic Hospital                                                            | 1977–1994              | Retrospective | HE                     | Yes               | PSA $\geq 0.1$                           | 273                | 63.8, 45–75                           | 273  | NA  | NA  | NA   | 49, 1–206                        |
| Leng <i>et al.</i> <sup>37</sup>          | Korea       | 2013 | Veterans Health Service Medical Center                                                              | 2005–2010              | Retrospective | NA                     | No                | PSA $\geq 0.2$                           | 166                | NA, NA                                | 167  | 0   | 0   | 0    | 33.7±18.7, NA                    |
| Chromecki <i>et al.</i> <sup>35</sup>     | USA         | 2011 | Weil Cornell Medical College                                                                        | NA                     | Retrospective | NA                     | No                | PSA $\geq 0.2$                           | 232                | 62.6, NA                              | 232  | 0   | 0   | 0    | 69.0, 4.3–113.4                  |
| Quinn <i>et al.</i> <sup>16</sup>         | Australia   | 2001 | St. Vincent's Hospital Campus                                                                       | 1986–1999              | Retrospective | NA                     | Yes               | PSA $\geq 0.4$                           | 732                | 62.1, 40.7–76.7                       | 724  | 83  | NA  | NA   | 41.1, 1.0–167.7                  |
| Huang <i>et al.</i> <sup>25</sup>         | China       | 2007 | Kaohsiung Medical University<br>Kaohsiung Veterans General Hospital                                 | 2000–2005              | Prospective   | NA                     | No                | PSA $\geq 0.2$                           | 126                | NA, NA                                | NA   | NA  | NA  | NA   | NA, NA                           |
| Jung <i>et al.</i> <sup>33</sup>          | Korea       | 2011 | Yonsei University College of Medicine                                                               | 2005–2009              | Retrospective | NA                     | Yes               | PSA $\geq 0.2$                           | 407                | 63.24, 38–82                          | 407  | 0   | 0   | 0    | 18.43, 6–50                      |
| Ferrari <i>et al.</i> <sup>18</sup>       | USA         | 2004 | Stanford University Medical Center                                                                  | 1984–1999              | Retrospective | HE                     | Yes               | PSA $\geq 0.1$                           | 620                | 64.5, 42–78                           | 614  | 0   | NA  | NA   | 90, 24–216                       |
| Luo <i>et al.</i> <sup>36</sup>           | China       | 2012 | Kaohsiung Chang Gung Memorial Hospital                                                              | 1998–2010              | Retrospective | NA                     | No                | PSA $\geq 0.2$                           | 87                 | 63, 49–83                             | NA   | NA  | NA  | NA   | 40.9, 0.6–99.9                   |
| Herman <i>et al.</i> <sup>15</sup>        | USA         | 2000 | Memorial Sloan-Kettering Cancer Center                                                              | 1983–1997              | Retrospective | HE                     | Yes               | PSA $\geq 0.4$                           | 263                | 64, NA                                | 263  | 8   | NA  | NA   | 36, 1–158                        |
| Baydar <i>et al.</i> <sup>27</sup>        | Turkey      | 2007 | Hacettepe University, School of Medicine                                                            | 1992–2001              | Retrospective | IHC (CD31)<br>HE       | Yes               | PSA $\geq 0.2$                           | 71                 | 62, 48–75                             | 69   | 0   | NA  | NA   | 54, 4–145                        |

BCR: biochemical recurrence; PSA: prostate specific antigen; EBRT: external beam radiotherapy; RP: radical prostatectomy; ADT: androgen deprivation therapy; PLND: pelvic lymph node dissection; Neo: neoadjuvant; HE: hematoxylin and eosin; IHC: immunohistochemistry; NA: not available; LVI: lymphovascular invasion
