# Supplementary material for: The prognostic value of lymphovascular invasion in radical prostatectomy: a systematic review and meta-analysis
Source: PubMed Central journal article supplement — Asian J Androl. 2015 Oct 13;18(5):780–5. doi: 10.4103/1008-682X.156636 (PMC5000804; doi:10.4103/1008-682x.156636), 2015-10-13
Supplement: AJA-18-780_Suppl2.pdf [file AJA-18-780_Suppl2.pdf]

**Supplementary Table 2: The TNM stage characteristics and correlations between LVI and preoperative PSA and pathological parameters**

| Study                                     | TNM stages and GS characteristics (staging system) | Number (%) of positive LVI | Preoperative PSA (ng ml <sup>-1</sup> ) |                      | P*      | pT stage >pT3/total |          | ECE Positive/total |          | SVI Positive/total |         | GS ≥7 GS/total |          | pN stage pN+/total |         |
|-------------------------------------------|----------------------------------------------------|----------------------------|-----------------------------------------|----------------------|---------|---------------------|----------|--------------------|----------|--------------------|---------|----------------|----------|--------------------|---------|
|                                           |                                                    |                            | LVI (+)                                 | LVI (-)              |         | LVI (+)             | LVI (-)  | LVI (+)            | LVI (-)  | LVI (+)            | LVI (-) | LVI (+)        | LVI (-)  | LVI (+)            | LVI (-) |
| Yee <i>et al.</i> <sup>34</sup>           | pT2-4, pN0-1<br>GS (<7, 7, >7) (2002 AJCC)         | 129/1298 (9.9)             | 7.3<br>(4.9-11.3)                       | 5.1<br>(3.7-7.1)     | <0.001  | 60/80               | 315/1115 | 97/129             | 348/1169 | 49/129             | 41/1169 | 123/129        | 855/1169 | 49/129             | 45/1169 |
| Lee <i>et al.</i> <sup>32</sup>           | pT2-4, pN0-1<br>GS (<7, 7, >7) (2002 AJCC)         | 40/361 (11.1)              | NA                                      | NA                   | NA      | NA                  | NA       | NA                 | NA       | NA                 | NA      | NA             | NA       | NA                 | NA      |
| Cho <i>et al.</i> <sup>31</sup>           | pT2-3, pNx<br>GS (<7, 7, >7) (2002 AJCC)           | 16/167 (9.6)               | NA                                      | NA                   | NA      | NA                  | NA       | NA                 | NA       | NA                 | NA      | NA             | NA       | NA                 | NA      |
| Jeon <i>et al.</i> <sup>30</sup>          | pT2-3, pN0-1<br>GS (<7, 7, >7) (2002 AJCC)         | 41/237 (17.3)              | 16.4<br>(2.7-98.0)                      | 10.5<br>(0.2-86.6)   | 0.002   | 30/41               | 62/196   | 26/41              | 58/196   | 17/41              | 15/196  | 39/41          | 144/194  | NA                 | NA      |
| Whitmore <i>et al.</i> <sup>28</sup>      | pT2-4, pN0-1<br>GS (7) (2002 AJCC)                 | 12/214 (5.6)               | NA                                      | NA                   | NA      | NA                  | NA       | NA                 | NA       | NA                 | NA      | NA             | NA       | NA                 | NA      |
| Yamamoto <i>et al.</i> <sup>29</sup>      | pT3a, pN0<br>GS (<7, 7, >7) (1997 AJCC)            | 26/94 (27.7)               | 12.8<br>(3.5-59.0)                      | 8.55<br>(0.5-75.0)   | 0.022   | 26/26               | 94/94    | NA                 | NA       | 0/26               | 0/68    | 23/26          | 42/68    | 0/26               | 0/68    |
| May <i>et al.</i> <sup>26</sup>           | pT2-3b, pN0<br>GS (<7, 7, >7) (1997 AJCC)          | 42/412 (10.2)              | 22.6<br>(6.4-151)                       | 10.9<br>(0.1-51)     | <0.001  | 27/42               | 86/370   | NA                 | NA       | NA                 | NA      | 33/42          | 136/370  | 0/42               | 0/370   |
| Hofer <i>et al.</i> <sup>23</sup>         | pTx, pN1<br>GS (<7, 7, >7) (2002 AJCC)             | 29/116 (25.0)              | NA                                      | NA                   | NA      | NA                  | NA       | NA                 | NA       | NA                 | NA      | NA             | NA       | 29/29              | 116/116 |
| Antunes <i>et al.</i> <sup>21</sup>       | pT2-3, pN0<br>GS (<7, 7, >7) (1992 AJCC)           | 47/428 (11.0)              | 10.6<br>(8.6-13.1)                      | 8<br>(7.5-8.5)       | 0.004   | 24/47               | 95/381   | 43/47              | 189/381  | 6/47               | 17/381  | 35/47          | 136/381  | 0/47               | 0/381   |
| Loeb <i>et al.</i> <sup>24</sup>          | pTx, pN0-1<br>GS (<7, 7, >7) (NA)                  | 118/1709 (6.9)             | 5.8                                     | 4.5                  | <0.0001 | 78/118              | 346/1573 | 55/115             | 196/1633 | 26/118             | 38/1591 | 70/117         | 473/1578 | 7/118              | 4/1591  |
| Brooks <i>et al.</i> <sup>22</sup>        | pTx, pN0-1<br>GS (<7, 7, >7) (NA)                  | 18/160 (11.3)              | 10.9<br>(4.7-40.7)                      | 17.7<br>(1.3-217)    | 0.44    | NA                  | NA       | 13/18              | 80/140   | 10/18              | 30/134  | 15/17          | 86/130   | 3/18               | 8/142   |
| Cheng <i>et al.</i> <sup>20</sup>         | pT2-3, pN0-1<br>GS (<7, 7, >7) (1997 AJCC)         | 106/504 (21.0)             | NA                                      | NA                   | NA      | 73/106              | 83/398   | 63/106             | 74/398   | 36/106             | 31/398  | 102/106        | 220/398  | 11/106             | 7/398   |
| Shariat <i>et al.</i> <sup>19</sup>       | pTx, pN0-1<br>GS (<7, 7, >7) (1997 AJCC)           | 32/630 (5.1)               | 7.8<br>(4.0-99.0)                       | 6.0<br>(0.1-52.0)    | 0.04    | NA                  | NA       | 26/32              | 156/598  | 22/32              | 35/598  | 31/32          | 343/598  | 8/32               | 2/598   |
| Ito <i>et al.</i> <sup>17</sup>           | pT2-3, pN0<br>GS (<7, 7, >7) (1997 AJCC)           | 38/82 (46.3)               | NA                                      | NA                   | NA      | NA                  | NA       | NA                 | NA       | NA                 | NA      | NA             | NA       | 0/38               | 0/44    |
| de la Taille <i>et al.</i> <sup>14</sup>  | pT2-3, pN0-1<br>GS (<7, 7, >7) (NA)                | 30/241 (12.4)              | NA                                      | NA                   | NA      | 20/30               | 56/211   | 21/30              | 48/211   | 7/30               | 11/211  | 28/30          | 92/211   | NA                 | NA      |
| van den Ouden <i>et al.</i> <sup>13</sup> | pT2-4, pN0-1<br>GS (<7, 7, >7) (1992 AJCC)         | 33/273 (12.1)              | NA                                      | NA                   | NA      | 32/33               | 155/240  | 30/33              | 145/240  | 21/33              | 57/240  | 16/33          | 45/240   | 5/33               | 22/240  |
| Leng <i>et al.</i> <sup>37</sup>          | pT2-4, pN0-1<br>GS (7) (2010 AJCC)                 | 40/166 (24.1)              | NA                                      | NA                   | NA      | NA                  | NA       | NA                 | NA       | NA                 | NA      | NA             | NA       | NA                 | NA      |
| Chromceki <i>et al.</i> <sup>35</sup>     | pTx, pN0-1<br>GS (<7, 7, >7) (NA)                  | 8/102 (7.8)                | NA                                      | NA                   | NA      | NA                  | NA       | NA                 | NA       | NA                 | NA      | NA             | NA       | NA                 | NA      |
| Quinn <i>et al.</i> <sup>16</sup>         | pT2-4, pN0-1<br>GS (<7, 7, >7) (1992 AJCC)         | 38/731 (5.2)               | NA                                      | NA                   | NA      | NA                  | NA       | NA                 | NA       | NA                 | NA      | NA             | NA       | NA                 | NA      |
| Huang <i>et al.</i> <sup>25</sup>         | pT2-4, pN0-1<br>GS (<7, 7, >7) (1997 AJCC)         | 17/111 (15.3)              | NA                                      | NA                   | NA      | NA                  | NA       | NA                 | NA       | NA                 | NA      | NA             | NA       | NA                 | NA      |
| Jung <i>et al.</i> <sup>33</sup>          | pT2-3, pN0-1<br>GS (<7, 7, >7) (2002 AJCC)         | 27/407 (6.6)               | 12.83<br>(2.40-30.78)                   | 9.83<br>(1.76-83.23) | 0.075   | 17/27               | 108/380  | 7/27               | 50/380   | 11/27              | 58/380  | 23/27          | 224/380  | 3/27               | 9/380   |
| Ferrari <i>et al.</i> <sup>18</sup>       | pTx, pN0-1<br>GS (<7, 7, >7) (NA)                  | 110/620 (17.7)             | NA                                      | NA                   | NA      | NA                  | NA       | 70/110             | 149/509  | 31/109             | 26/510  | 108/110        | 393/504  | 15/108             | 24/506  |
| Luo <i>et al.</i> <sup>36</sup>           | pTx, pN0-1<br>GS (<7, 7, >7) (NA)                  | 18/87 (20.7)               | NA                                      | NA                   | NA      | NA                  | NA       | 14/18              | 26/69    | 10/18              | 28/69   | 9/18           | 8/69     | 2/18               | 3/69    |
| Herman <i>et al.</i> <sup>15</sup>        | pT3, pN0<br>GS (<7, 7, >7) (NA)                    | 91/172 (52.9)              | NA                                      | NA                   | NA      | NA                  | NA       | 63/91              | 97/172   | 37/91              | 26/172  | 76/91          | 116/172  | 0/91               | 0/172   |
| Baydar <i>et al.</i> <sup>27</sup>        | pT2-3, pN0-1<br>GS (<7, 7, >7) (NA)                | 11/71 (15.5)               | NA                                      | NA                   | NA      | 11/11               | 36/60    | 11/11              | 36/59    | 7/11               | 11/60   | 11/11          | 42/60    | 4/11               | 1/58    |

\*A P value represent a statistically difference. TNM: tumor-node-metastasis; ECE: extracapsular extension; SVI: seminal vesicle involvement; LVI: lymphovascular invasion; PSA: prostate-specific antigen; pT: pathological tumor; pN: pathological node; AJCC: American Joint Committee on Cancer and the International Union Against Cancer; GS: Gleason score; NA: not available
