# Supplementary material for: The prognostic value of lymphovascular invasion in radical prostatectomy: a systematic review and meta-analysis
Source: PubMed Central journal article supplement — Asian J Androl. 2015 Oct 13;18(5):780–5. doi: 10.4103/1008-682X.156636 (PMC5000804; doi:10.4103/1008-682x.156636), 2015-10-13
Supplement: AJA-18-780_Suppl4.pdf [file AJA-18-780_Suppl4.pdf]

**Supplementary Table 4: Subgroup analysis of biochemical recurrence-free survival**

|                            | Number of included articles | Number of cases | Pooled HR (95% CI)                                | ES                | Heterogeneity      | P (het) | Publication bias |           |
|----------------------------|-----------------------------|-----------------|---------------------------------------------------|-------------------|--------------------|---------|------------------|-----------|
|                            |                             |                 |                                                   |                   | I <sup>2</sup> (%) |         | Begg's P         | Egger's P |
| Region                     |                             |                 |                                                   |                   |                    |         |                  |           |
| Asian                      | 8                           | 1625            | 1.479 (1.139–1.921)<br>Fix, (inverse variance)    | Z=2.94<br>P=0.003 | 32.2               | 0.171   | 0.108            | 0.405     |
| Other                      | 13                          | 6818            | 2.322 (1.771–3.043)<br>Random, (inverse variance) | Z=6.10<br>P<0.001 | 62.9               | 0.001   | 0.035            | 0.058     |
| Number of patients         |                             |                 |                                                   |                   |                    |         |                  |           |
| <200                       | 8                           | 998             | 2.590 (1.539–4.360)<br>Fix, (inverse variance)    | Z=3.58<br>P=0.000 | 69.2               | 0.002   | 0.386            | 0.209     |
| 200–500                    | 8                           | 2771            | 2.219 (1.454–3.387)<br>Random, (inverse variance) | Z=3.69<br>P=0.000 | 63.7               | 0.007   | 0.902            | 0.757     |
| >500                       | 5                           | 4872            | 1.582 (1.281–1.953)<br>Fix, (inverse variance)    | Z=4.27<br>P=0.000 | 0.0                | 0.963   | -                | -         |
| Pathologic N stage         |                             |                 |                                                   |                   |                    |         |                  |           |
| pN–                        | 4                           | 1016            | 2.493 (1.471–4.224)<br>Random, (inverse variance) | Z=3.39<br>P=0.001 | 69.1               | 0.021   | -                | -         |
| pN+                        | 1                           | 116             | 1.9 (1.1–3.5)                                     | NA                | NA                 | NA      | NA               | NA        |
| Median follow-up           |                             |                 |                                                   |                   |                    |         |                  |           |
| ≤24 months                 | 4                           | 897             | 3.645 (2.091–6.353)<br>Fix, (inverse variance)    | Z=4.56<br>P=0.000 | 19.0               | 0.295   | -                | -         |
| 24–36 months               | 3                           | 3173            | 1.442 (1.059–1.965)<br>Fix, (inverse variance)    | Z=2.32<br>P=0.020 | 43.5               | 0.170   | -                | -         |
| >36 months                 | 12                          | 4048            | 2.031 (1.536–2.685)<br>Random, (inverse variance) | Z=4.97<br>P=0.000 | 64.3               | 0.001   | 0.902            | 0.511     |
| LVI independent predictor? |                             |                 |                                                   |                   |                    |         |                  |           |
| No                         | 9                           | 4519            | 1.374 (1.088–1.734)<br>Fix, (inverse variance)    | Z=2.67<br>P=0.008 | 0.0                | 0.598   | 0.536            | 0.496     |
| Yes                        | 12                          | 3924            | 2.618 (1.953–3.509)<br>Random, (inverse variance) | Z=6.44<br>P=0.000 | 63.3               | 0.002   | 0.019            | 0.038     |
| Definition of BCR          |                             |                 |                                                   |                   |                    |         |                  |           |
| PSA≥0.1                    | 3                           | 2075            | 1.765 (1.353–2.301)<br>Fix, (inverse variance)    | Z=4.19<br>P=0.000 | 0.0                | 0.623   | -                | -         |
| PSA≥0.2                    | 14                          | 4926            | 2.311 (1.610–3.318)<br>Random, (inverse variance) | Z=4.54<br>P=0.000 | 70.2               | 0.000   | 0.902            | 0.544     |
| PSA≥0.4                    | 4                           | 1442            | 1.691 (1.252–2.285)<br>Fix, (inverse variance)    | Z=3.43<br>P=0.001 | 0.0                | 0.733   | -                | -         |
| Stain method               |                             |                 |                                                   |                   |                    |         |                  |           |
| HE                         | 9                           | 5192            | 1.776 (1.483–2.128)<br>Fix, (inverse variance)    | Z=6.23<br>P=0.000 | 35.9               | 0.131   | 0.386            | 0.117     |
| IHC and HE                 | 1                           | 412             | 4.39 (2.47–7.8)                                   | NA                | NA                 | NA      | NA               | NA        |

PSA: prostate-specific antigen; BCR: biochemical recurrences; HE: hematoxylin and eosin; IHC: immunohistochemistry; HR: hazard ratio; CI: confidence interval; LVI: lymphovascular invasion; ES: effect size; NA: not available
